# Supplementary material for: Population-based survey of overweight and obesity and the associated factors in peri-urban and rural Eastern Uganda
Source: BMC Public Health. 2015 Nov 24;15:1168. doi: 10.1186/s12889-015-2506-7 (PMC4659217; doi:10.1186/s12889-015-2506-7)
Supplement: Additional file 1: — Distribution of body mass index by age, sex and sexes combined. Description of data: The table provides details on the distribution of different groups of body mass index stratified by sex and age groups. (XLSX 11 kb) [file 12889_2015_2506_MOESM1_ESM.xlsx]

## Sheet: Sheet1
Distribution of body mass index by age, sex and sexes combined.
	18–24	25–34	35–44	45–54	55–64	≥ 65	Total
Women	n (%)	n (%)	n (%)	n (%)	n (%)	n (%)	n (%)
< 16.0	1 (1.3)	0 (0.0)	1 (0.6)	1 (0.9)	0 (0.0)	0 (0.0)	3 (0.5)
16.0 – 16.99	0 (0.0)	1 (0.8)	0 (0.0)	0 (0.0)	0 (0.0)	4 (6.2)	5 (0.8)
17.0 – 18.49	1 (1.3)	4 (3.1)	5 (3.2)	3 (2.7)	9 (14.1)	6 (9.2)	28 (4.6)
18.5 – 19.99	10 (12.5)	13 (10.2)	10 (6.3)	9 (8.1)	9 (14.1)	5 (7.7)	56 (9.2)
20.0 – 22.49	34 (42.5)	37 (28.9)	37 (23.4)	15 (13.5)	20 (31.3)	23 (35.4)	166 (27.4)
22.5 – 24.99	19 (23.8)	35 (27.3)	34 (21.5)	26 (23.4)	8 (12.5)	9 (13.8)	131 (21.6)
25.0 – 27.49	8 (10.0)	19 (14.8)	29 (18.4)	24 (21.6)	4 (6.3)	10 (15.4)	94 (15.5)
27.5 – 29.99	3 (3.8)	9 (7.0)	17 (10.8)	8 (7.2)	7 (10.9)	2 (3.1)	46 (7.6)
30.0 – 34.99	4 (5.0)	7 (5.5)	16 (10.1)	15 (13.5)	6 (9.4)	6 (9.2)	54 (8.9)
35.0 – 39.99	0 (0.0)	3 (2.3)	5 (3.2)	8 (7.2)	0 (0.0)	0 (0.0)	16 (2.6)
≥ 40	0 (0.0)	0 (0.0)	4 (2.5)	2 (1.8)	1 (1.6)	0 (0.0)	7 (1.2)
Total	80 (100)	128 (100)	158 (100)	111 (100)	64 (100)	65 (100)	606 (100)
Men
< 16.0	0 (0.0)	0 (0.0)	0 (0.0)	0 (0.0)	0 (0.0)	3 (4.0)	3 (0.5)
16.0 – 16.99	1 (1.1)	1 (0.8)	1 (0.7)	0 (0.0)	2 (2.7)	4 (5.3)	9 (1.5)
17.0 – 18.49	3 (3.4)	8 (6.7)	8 (5.8)	7 (6.3)	5 (6.8)	6 (8.0)	37 (6.1)
18.5 – 19.99	18 (20.7)	25 (21.0)	19 (13.7)	22 (19.8)	13 (17.8)	15 (20.0)	112 (18.5)
20.0 – 22.49	45 (51.7)	49 (41.2)	60 (43.2)	36 (32.4)	24 (32.9)	27 (36.0)	241 (39.9)
22.5 – 24.99	14 (16.1)	31 (26.1)	26 (18.7)	22 (19.8)	15 (20.5)	7 (9.3)	115 (19.0)
25.0 – 27.49	4 (4.6)	5 (4.2)	17 (12.2)	11 (9.9)	7 (9.6)	9 (12.0)	53 (8.8)
27.5 – 29.99	1 (1.1)	0 (0.0)	7 (5.0)	8 (7.2)	3 (4.1)	3 (4.0)	22 (3.6)
30.0 – 34.99	0 (0.0)	0 (0.0)	1 (0.7)	4 (3.6)	2 (2.7)	1 (1.3)	8 (1.3)
35.0 – 39.99	0 (0.0)	0 (0.0)	0 (0.0)	1 (0.9)	2 (2.7)	0 (0.0)	3 (0.5)
≥ 40	1 (1.1)	0 (0.0)	0 (0.0)	0 (0.0)	0 (0.0)	0 (0.0)	1 (0.2)
Total	87 (100)	119 (100)	139 (100)	111 (100)	73 (100)	75 (100)	604 (100)
Sexes combined
< 16.0	1 (0.6)	0 (0.0)	1 (0.3)	1 (0.5)	0 (0.0)	3 (2.1)	6 (0.5)
16.0 – 16.99	1 (0.6)	2 (0.8)	1 (0.3)	0 (0.0)	2 (1.5)	8 (5.7)	14 (1.2)
17.0 – 18.49	4 (2.4)	12 (4.9)	13 (4.4)	10 (4.5)	14 (10.2)	12 (8.6)	65 (5.4)
18.5 – 19.99	28 (16.8)	38 (15.4)	29 (9.8)	31 (14.0)	22 (16.1)	20 (14.3)	168 (13.9)
20.0 – 22.49	79 (47.3)	86 (34.8)	97 (32.7)	51 (23.0)	44 (32.1)	50 (35.7)	407 (33.6)
22.5 – 24.99	33 (19.8)	66 (26.7)	60 (20.2)	48 (21.6)	23 (16.8)	16 (11.4)	246 (20.3)
25.0 – 27.49	12 (7.2)	24 (9.7)	46 (15.5)	35 (15.8)	11 (8.0)	19 (13.6)	147 (12.1)
27.5 – 29.99	4 (2.4)	9 (3.6)	24 (8.1)	16 (7.2)	10 (7.3)	5 (3.6)	68 (5.6)
30.0 – 34.99	4 (2.4)	7 (2.8)	17 (5.7)	19 (8.6)	8 (5.8)	7 (5.0)	62 (5.1)
35.0 – 39.99	0 (0.0)	3 (1.2)	5 (1.7)	9 (4.1)	2 (1.5)	0 (0.0)	19 (1.6)
≥ 40	1 (0.6)	0 (0.0)	4 (1.3)	2 (0.9)	1 (0.7)	0 (0.0)	8 (0.7)
Total	167 (100)	247 (100)	297 (100)	222 (100)	137 (100)	140 (100)	1210 (100)
